# Supplementary material for: FilaggrinHigh melanomas exhibit active FGFR and allergic signatures with impaired GNA14 and Th1 signatures
Source: Frontiers journal article supplement (doi:10.3389/fgene.2025.1569403), 2025-07-18
Supplement: Supplementary_file_1.doc [file Supplementary_file_1.doc]

**Supplementary information:** supplementary figure legends

**FilaggrinHigh Melanomas Exhibit Active FGFR, Allergic skin, with Impaired GNA14 and Th1 Signatures**

Goodwin G. Jinesh1, 2,†,*, and Isha Godwin3,†,

**Supplementary figure legend**

**Figure-S1 Filaggrin-based SKCM patient grouping, and C1-positional GSEA of differentially expressed genes. A,** Filaggrin-based SKCM patient grouping (FLG+FLG2 combined average-based) of melanoma (SKCM) tumor samples with equal number of samples in both groups (n = 47 samples each). A 0-10% and 90-100% ranges were set as cut-off for grouping. **B,** C1-positional GSEA of filaggrinHigh versus filaggrinLow differentially expressed genes showing the top enrichment of chromosome-1q21 band of human genome as the location with high differential gene expression. This gene signature is dominated by mRNAs of filaggrins, proline-rich proteins, late cornified envelope proteins, and S100A proteins.
